# Supplementary material
Source: PubMed Central journal article supplement (PMC3910874)
Supplement: AAC.01897-13_zac002142540so1.pdf [file AAC.01897-13_zac002142540so1.pdf]

**TABLE S1** Antimicrobial Resistance Determinant Microarray (ARDM) v.2 content

| Gene                  | Genbank accession no. | Locus       | # probes/gene |
|-----------------------|-----------------------|-------------|---------------|
| ARTHAC1 (control)     | AF198054              | 100-1158    | 20            |
| ARTHTIM (control)     | AF247559              | 100-1160    | 20            |
| blaVEB-1              | DQ393569              | 1955-2854   | 9             |
| penA                  | U85041                | 1163-2017   | 9             |
| bla1                  | AF367983              | 626-1555    | 10            |
| bla2                  | AF367984              | 791-1561    | 10            |
| pbp5                  | AF375986              | 1-668       | 9             |
| blaZ                  | M60253                | 142-987     | 6             |
| mecA                  | AB096217              | 20340-22346 | 10            |
| pbp1A                 | AF446215              | 1-1766      | 10            |
| blaVIM-2              | AF369871              | 553-1353    | 9             |
| blaIMP-2              | AJ243491              | 539-1279    | 10            |
| blaSIM-1              | AY887066              | 494-1234    | 9             |
| blaOXA-51-like        | DQ385606.1            | 669-1493    | 10            |
| ampC (Acinetobacter)  | EF016355.1            | 1-1152      | 9             |
| blaIMP-1              | EU686386              | 1137-1877   | 10            |
| blaOXA-23             | FJ959346.1            | 192-1013    | 9             |
| blaOXA-58-like        | HQ219687.1            | 280-1122    | 10            |
| blaOXA-24             | NC_012813.1           | 2519-3346   | 10            |
| blaCTX-M-8 family     | AF189721              | 274-1149    | 10            |
| blaSHV-1/PIT-2 family | AF148850              | 6-866       | 10            |
| blaCTX-M-9 family     | AF174129              | 6336-7211   | 10            |
| blaOXA-1              | J02967                | 1359-2189   | 9             |
| blaACC-2              | AF180952              | 1565-2737   | 9             |
| blaSME-2              | AF275256              | 1-885       | 9             |
| blaIMI-3/nmc          | AY780889.1            | 7813-8691   | 9             |
| blaKPC family         | AF297554              | 131-1012    | 10            |
| blaTEM family         | AF309824              | 119-979     | 9             |
| blaOXY-2              | AJ871866              | 1-873       | 9             |
| blaLEN-1              | AY037780              | 89-949      | 6             |
| blaMOX                | D13304                | 233-1381    | 10            |
| blaGES family         | EF219163              | 1-795       | 10            |
| blaNDM                | FN396876              | 2407-3219   | 10            |
| blaMIR-1              | M37839.2              | 928-2073    | 10            |
| blaOXA-9              | M55547                | 2314-3138   | 9             |
| blaFOX-1              | X77455                | 701-1849    | 10            |
| blaLAT-1/LAT-4        | X78117                | 142-1287    | 9             |
| blaOXY-1              | Z30177                | 349-1224    | 10            |
| blaOXA-48             | AY236073.2            | 2188-2985   | 10            |
| blaCTX-M-1 family     | EF570052              | 240-1115    | 10            |
| blaGIM-1              | AJ620678              | 1041-1793   | 9             |
| blaSPM-1              | AY341249              | 2291-3121   | 10            |
| blaBEL                | DQ089809.1            | 1006-1857   | 9             |
| blaOXA-10/PSE-2       | EU708817              | 2161-2961   | 8             |
| blaPSE-1/CARB-2       | M69058                | 146-1012    | 8             |
| amp(C)                | AJ237702              | 4744-5883   | 9             |

|                            |            |             |    |
|----------------------------|------------|-------------|----|
| blaCTX-M-2 family          | X92507     | 6-881       | 10 |
| blaPER-2                   | X93314     | 278-1204    | 9  |
| grmA                       | AY524043   | 12798-13622 | 8  |
| grmO                       | AY524043   | 6802-7695   | 6  |
| grm                        | M55521     | 121-945     | 10 |
| nbrB                       | AF038408   | 116-961     | 9  |
| kmr                        | AB164642   | 18982-19815 | 9  |
| aad(K)                     | M26879     | 90-944      | 10 |
| aph/aph(3')-Iva            | X03364     | 277-1065    | 10 |
| aph(2')-Id                 | AF016483   | 131-1036    | 9  |
| aad(E)                     | AF516335   | 14900-15808 | 9  |
| aac(6')-li                 | L12710     | 169-717     | 10 |
| aph(2')-Ic                 | U51479     | 1-1270      | 9  |
| aph(3')-iii/aph(A3) family | M36771     | 293-1084    | 10 |
| ant(9)-Ia                  | X02588     | 331-1113    | 9  |
| fmrO                       | D13171     | 1477-2358   | 6  |
| ant(6)-Ia                  | DQ112355   | 2075-2533   | 8  |
| aphA6                      | EU977572.1 | 1-780       | 9  |
| aac(6')-ig                 | L09246     | 544-981     | 10 |
| aac(6')-ik                 | L29510     | 396-806     | 10 |
| armA                       | AF550415.2 | 72385-73158 | 10 |
| aac(6')-Im                 | AF337947   | 1215-1751   | 9  |
| aph(2')-Ib                 | AF337947   | 272-1171    | 8  |
| aad(A1)                    | AY339625   | 10986-11777 | 8  |
| aac(3)-Iva                 | X01385     | 244-1029    | 10 |
| aph(A2)                    | X57709     | 1-795       | 8  |
| aad(A4)                    | Z50802     | 1306-2094   | 10 |
| rmtB                       | AB117036   | 1-756       | 9  |
| npmA                       | AB261016   | 3069-3728   | 9  |
| rmtE                       | GU201947   | 55-876      | 10 |
| rmtC                       | AB194779.2 | 6903-7748   | 9  |
| rmtA                       | AB120321.1 | 6677-7432   | 9  |
| rmtD                       | DQ914960   | 8889-9632   | 9  |
| ant(4')-IIa                | M98270     | 136-903     | 10 |
| aad(B)                     | AY204504   | 2058-2591   | 9  |
| aac(3)-Id                  | AY458224   | 707-1183    | 9  |
| aad(A7)                    | AY458224   | 1259-2056   | 9  |
| aph3'/str(A)               | AY055428   | 19405-20208 | 9  |
| aph6/str(B)                | AY055428   | 18569-19405 | 9  |
| aac(6)-Ib family           | AY103455   | 143-721     | 10 |
| ant(2'')-Ia                | X04555     | 1149-1829   | 8  |
| aac(C1)                    | U04610     | 670-1203    | 9  |
| aph(AI)                    | U13633     | 6554-7369   | 10 |
| aac(3)-III                 | X13542     | 186-1046    | 10 |
| erm(36)/erm(ML)            | AF462611   | 186-1031    | 9  |
| erm(U)/lmr(B)              | AF237667   | 101-1546    | 10 |
| erm(X)/erm(CD)             | M36726     | 296-1150    | 10 |
| erm(30)/pik(R1)            | AF079138   | 1283-2293   | 10 |
| erm(Z)/srm(D)              | AM709783   | 2817-3665   | 10 |

|                          |           |             |    |
|--------------------------|-----------|-------------|----|
| erm(H)/car(B)            | M16503    | 244-1143    | 9  |
| erm(35)                  | AF319779  | 33-833      | 8  |
| erm(F)                   | M14730    | 241-1041    | 9  |
| erm(34)                  | AY234334  | 355-1200    | 9  |
| erm(D)                   | M29832    | 430-1293    | 9  |
| msrC                     | AY004350  | 496-1974    | 9  |
| erm(B)                   | M11180    | 714-1451    | 9  |
| msr(A)/msrB/msrSA family | AB013298  | 487-1953    | 12 |
| erm(33)                  | AJ313523  | 163-894     | 9  |
| mphC                     | AM397632  | 1-900       | 9  |
| erm(C)                   | M19652    | 988-1722    | 6  |
| erm(A)                   | X03216    | 4551-5282   | 10 |
| mef(A)/mefE family       | AF227520  | 3254-4471   | 19 |
| msr(D)/mel               | AF227521  | 4607-6070   | 10 |
| mre(A)                   | U92073    | 119-1054    | 9  |
| erm(Q)                   | L22689    | 262-1035    | 8  |
| mac(A)                   | AB071145  | 1-1143      | 9  |
| mph(A)/mphK family       | D16251    | 1626-2531   | 10 |
| ere(B)                   | A15097    | 383-1642    | 9  |
| mph(B)                   | AB020531  | 4167-5075   | 9  |
| mac(B)                   | AB071146  | 1-1947      | 8  |
| mph(D)                   | AB048591  | 1-840       | 9  |
| ere(A2)                  | AF512546  | 716-1942    | 6  |
| tet(Z)                   | AF121000  | 11880-13034 | 9  |
| tet(33)                  | NC_003227 | 22940-24163 | 9  |
| tet(30)                  | AF090987  | 1130-2314   | 10 |
| tet(36)                  | AJ514254  | 2534-4456   | 9  |
| tet(X)                   | M37699    | 586-1752    | 9  |
| tet(L)p                  | M11036    | 189-1565    | 10 |
| tet(L)c                  | X08034    | 188-1564    | 10 |
| tet(Q)                   | X58717    | 586-2511    | 9  |
| tet(U)                   | U01917    | 413-730     | 10 |
| tet(S)                   | L09756    | 447-2372    | 9  |
| tet(38)                  | AY825285  | 1-1353      | 10 |
| tet(K)                   | M16217    | 305-1684    | 9  |
| tet(T)                   | L42544    | 478-2433    | 9  |
| tet(M)                   | X04388    | 131-2050    | 9  |
| tet(W)                   | AJ222769  | 3687-5606   | 9  |
| tetO/tet32 family        | AJ295238  | 164-2083    | 8  |
| tetA(P)                  | L20800    | 1063-2325   | 10 |
| tetB(P)                  | L20800    | 2309-4267   | 9  |
| tet(39)                  | AY743590  | 749-1936    | 9  |
| tet(31)                  | AJ250203  | 1651-2883   | 9  |
| tet(Y)                   | AF070999  | 1680-2855   | 10 |
| tet(E)                   | L06940    | 21-1238     | 9  |
| tet(B)                   | V00611    | 61-1266     | 9  |
| tet(C)                   | Y19114    | 1-1138      | 10 |
| tet(V)                   | AF030344  | 462-1721    | 10 |
| tet(H)                   | U00792    | 716-1918    | 9  |

|                    |            |                 |    |
|--------------------|------------|-----------------|----|
| tet(J)             | AF038993   | 1084-2280       | 9  |
| tet(G)             | AF133140   | 757-1932        | 9  |
| tet(A)             | X75761     | 1059-2258       | 9  |
| tet(D)             | X65876     | 1521-2705       | 9  |
| tet(34)            | AB061440   | 306-770         | 10 |
| tet(35)/eff(J)     | AF353562   | 2213-3322       | 9  |
| tet(37)            | AF540889   | 1-327           | 10 |
| van(F)             | AF098802   | 1-476           | 8  |
| van(C1)            | AF162694   | 1411-2442       | 9  |
| van(G)             | AF253562   | 3715-4764       | 8  |
| vanD4/D5 family    | AF277571   | 1262-2293       | 8  |
| van(E)             | AF430807   | 2976-4034       | 9  |
| van(X)             | AF516335   | 2787-3755       | 9  |
| van(Y)             | AF516335   | 4785-5393       | 9  |
| van(H)             | AF516335   | 15805-16347     | 9  |
| van(C3)            | AY033764   | 26-1078         | 8  |
| van(S)             | M97297     | 4649-5803       | 9  |
| van(A)             | M97297     | 6979-8010       | 9  |
| van(B)/(B2) family | U00456     | 62-1090         | 8  |
| arr-3              | AY038837   | 555-1007        | 9  |
| vcmA               | AB063193   | 176-1549        | 9  |
| vcrM               | AB073219   | 282-1619        | 9  |
| vcaM               | AB073220   | 250-2109        | 9  |
| vceA               | AF012101   | 562-1749        | 9  |
| vceB               | AF012101   | 1759-3294       | 10 |
| catTC family       | U75299     | 657-1373        | 8  |
| cfr                | AJ249217   | 570-1619        | 10 |
| cat(S)             | X74948     | 1-492           | 9  |
| cat(Q)             | M55620     | 459-1118        | 9  |
| cmr(Ecoli)         | U44900.1   | 1-1572          | 10 |
| cmlA               | AY816215   | 1535-2921       | 10 |
| floR               | AF332662   | 1657-2871       | 9  |
| catA1/cat4 family  | AP000342   | 20342-21001     | 9  |
| floR               | AB114188   | 11605-12819     | 9  |
| cat(P)             | L02937     | 4207-4830       | 9  |
| Inu(B)/lin(B)      | AJ238249   | 127-930         | 9  |
| Inu(A)/lin(A)      | J03947     | 645-1130        | 9  |
| InuC               | AY928180   | 1150-1644       | 9  |
| Inu(D)             | EF452177   | 19-513          | 9  |
| Inu(F)/lin(F)      | AJ561197   | 1321-2142       | 9  |
| Inu(G)/lin(G)      | DQ836009   | 1310-2131       | 8  |
| lsa(A)             | AY225127   | 41-1537         | 10 |
| lsa(B)             | AJ579365   | 4150-5628       | 9  |
| norA               | D90119     | 478-1644        | 10 |
| qnr                | AY259086   | 8075-8731       | 9  |
| qepA               | AB263754.2 | 7052-8587       | 6  |
| qnrS               | GQ214053.1 | 9109-9765       | 10 |
| qacE(ABC)          | CP000521.1 | 3291438-3291779 | 10 |
| qacED1             | AY259086   | 4692-5039       | 8  |

|                        |            |                 |    |
|------------------------|------------|-----------------|----|
| vat(E6)                | AY043210   | 1-645           | 8  |
| vat(D)/sat(A)          | L12033     | 162-791         | 10 |
| vat(C)                 | AF015628   | 1307-1945       | 10 |
| vgb(B)                 | AF015628   | 399-1286        | 9  |
| vga(A)lc               | DQ823382   | 1-1569          | 9  |
| vat(A)                 | L07778     | 258-917         | 9  |
| vgb(A)/vgh             | M20129     | 641-1540        | 10 |
| vat(B)                 | U19459     | 67-705          | 9  |
| vga(B)                 | U82085     | 629-2287        | 9  |
| vat(F)/sat             | AF170730   | 70-735          | 9  |
| sat4                   | AF516335   | 5821-6366       | 9  |
| sat2                   | AB161463.1 | 1073-1597       | 9  |
| sulll                  | AJ313522   | 449-1264        | 9  |
| sullll                 | AJ459418   | 2979-3770       | 9  |
| sull                   | X12870     | 2595-3434       | 9  |
| dfrA3                  | NC_006526  | 317899-318396   | 9  |
| dfr(A)                 | AF051916   | 2823-3308       | 9  |
| dfr(D)                 | Z50141     | 82-582          | 8  |
| folA                   | CP000521.1 | 494601-495110   | 9  |
| dfrA25                 | AB280920   | 132-590         | 8  |
| dfrA3b                 | AY162283   | 5616-6095       | 9  |
| dfrA16                 | EU158182   | 117-590         | 9  |
| dfrA17                 | AF169041   | 162-635         | 8  |
| dfrA14                 | AJ313522   | 1873-2346       | 8  |
| dfrA5                  | AJ419169   | 117-590         | 9  |
| dfrA7                  | AJ419170   | 118-687         | 9  |
| dfrA2d                 | AJ429132   | 69-305          | 6  |
| dfrA24                 | AJ972619   | 83-640          | 9  |
| dfrA26                 | AM403715   | 303-854         | 9  |
| dfrA10                 | L06418     | 5494-6057       | 10 |
| dfrA8                  | NC_010064  | 711-1220        | 9  |
| dfrA2a                 | U36276     | 717-953         | 9  |
| dfrA9                  | X57730     | 726-1259        | 9  |
| dfrA12                 | Z21672     | 310-807         | 9  |
| dfrA13/21/22/23 family | Z50802     | 718-1215        | 8  |
| dfrA15                 | DQ989302   | 248-721         | 9  |
| dfrA19                 | AJ310778   | 7004-7573       | 9  |
| dfrA20                 | AJ605332   | 1304-1813       | 9  |
| dfrA6                  | Z86002     | 336-809         | 10 |
| dfrA1                  | AJ628353   | 2654-3112       | 9  |
| dfrA18                 | AY034138   | 7413-7967       | 10 |
| dfrA27                 | EU678897   | 1039-1512       | 10 |
| ileS                   | HQ625437.1 | 850-3929        | 10 |
| ptmP3                  | FJ655920.1 | 42293-43507     | 6  |
| uppP                   | CP000521.1 | 3207904-3208722 | 9  |

---

**TABLE S2** Polymerase chain reaction and sequencing primers used in this study

| Primer name          | Primer sequence                 | Target                                                      | Reference  |
|----------------------|---------------------------------|-------------------------------------------------------------|------------|
| Int1F                | CAG TGG ACA TAA GCC TGT TC      | <i>int1</i> - detection                                     | 1          |
| Int1R                | CCC GAG GCA TAG ACT GTA         |                                                             |            |
| Int2F                | TTG CGA GTA TCC ATA ACC TG      | <i>int2</i> - detection                                     |            |
| Int2R                | TTA CCT GCA CTG GAT TAA GC      |                                                             |            |
| intl3L               | GCC TCC GGC AGC GAC TTT CAG     | <i>int3</i> - detection                                     | 4          |
| intl3R               | ACGGATCTGCCAAACCTGACT           |                                                             | 4          |
| 5'-CS                | GGC ATC CAA GCA GCA AG          | Class 1 integron cassette array                             | 2          |
| 3'-CS                | AAG CAG ACT TGA CCT GA          |                                                             |            |
| 5'-CSa               | TCT CGG GTA ACA TCA AGG         |                                                             | 3          |
| int2S                | ACC TTT TTG TCG CATATCCGTG      | Class 2 integron cassette array                             | 4          |
| intCS2               | TAC CTG TTC TGC CCG TAT CT      |                                                             |            |
| GES-5-int-2-F        | TCG AAT GGT CTC CTG CCA CG      | <i>bla</i> <sub>GES11</sub> -containing integron sequencing | This study |
| GES-3-int-2-R        | TAC CTT GCC TCT CAA ACC CC      |                                                             |            |
| aac(3)-III/IV-F      | GAC GAC GAG CCG TTC GAY CC      | <i>aac(3)</i> -III/IV - detection                           | 5          |
| aac(3)-III/IV-R      | CCA TCA ACT CGG CAA GAT GSA G   |                                                             |            |
| dfrA19-F             | TCG CTG TGG ATT CTA AGT TGG     | <i>dfrA19</i> - detection                                   | 6          |
| dfrA19-R             | CGC CAT CCT TTT CTA ACT GC      |                                                             |            |
| CMLAF2               | ACT AAT GAT GGC AGG CAA G       | <i>cmlA</i> - detection                                     | 7          |
| CMLAR2               | AAG ACA GAC CGA GCA CGA CT      |                                                             |            |
| armA-F               | AGG TTG TTT CCA TTT CTG AG      | <i>armA</i> - detection                                     | 8          |
| armA-R               | TCT CTT CCA TTC CCT TCT CC      |                                                             |            |
| aac(6')-F            | TTG CGA TGC TCT ATG AGT GGC TA  | <i>aac(6')</i> - <i>lb</i> - detection                      | 9          |
| aac(6')-R            | CTC GAA TGC CTG GCG TGT TT      |                                                             |            |
| tetA-F               | GCG CGA TCT GGT TCA CTC G       | <i>tet(A)</i> - detection                                   | 10         |
| tetA-R               | AGT CGA CAG YRG CGC CGG C       |                                                             |            |
| tetB-F               | CGT TTG CTT TCA GGG ATC A       | <i>tet(B)</i> - detection                                   | 11         |
| tetB-R               | ACC ATC ATG CTA TTC CAT CC      |                                                             |            |
| tet39-F              | CTC CTT CTC TAT TGT GGC TA      | <i>tet(39)</i> - detection                                  | 12         |
| tet39-R              | CAC TAA TAC CTC TGG ACA TCA     |                                                             |            |
| OXA51-like-F         | TAA TGC TTT GAT CGG CCT TG      | <i>bla</i> <sub>OXA51-like</sub> - detection                | 13         |
| OXA51-like-R         | TGG ATT GCA CTT CAT CTT GG      |                                                             |            |
| 5'OXA-51-like-all-F  | ATG AAC ATT AAA GCA CTC         | <i>bla</i> <sub>OXA51</sub> – full gene amplification       | 14         |
| 3'OXA-51-like-all-R  | CTA TAA AAT ACC TAA TTG TTC     |                                                             |            |
| OXA51-5ext-F         | AAT TGG CCG ATG CTT TTA TC      |                                                             | This study |
| OXA51-5ext-R         | TGT TGA GTT TGG CCT TGT TG      |                                                             |            |
| OXA51-3ext-F         | TGC AAT CCA TGT TAT TCA TAG AAG |                                                             |            |
| OXA51-3ext-R         | GGC CCA GAT CAA AAT GGT AA      |                                                             |            |
| ISAb <sub>1</sub> -F | CAC GAA TGC AGA AGT TG          | ISAb <sub>1</sub> - detection                               | 15         |
| ISAb <sub>1</sub> -R | CGA CGA ATA CTA TGA CAC         |                                                             |            |
| OXA23-like-F         | GAT CGG ATT GGA GAA CCA GA      | <i>bla</i> <sub>OXA23-like</sub> - detection                | 13         |
| OXA23-like-R         | ATT TCT GAC CGC ATT TCC AT      |                                                             |            |
| OXA58-like-F         | AAG TAT TGG GGC TTG TGC TG      | <i>bla</i> <sub>OXA58-like</sub> - detection                |            |
| OXA58-like-R         | CCC CTC TGC GCT CTA CAT AC      |                                                             |            |

## REFERENCES

1. Koeleman J.G., J. Stoof, M.W. Van Der bijl, C.M. Vandenbroucke-Grauls and P.H. Savelkoul. 2000. Identification of epidemic strains of *Acinetobacter baumannii* by integrase gene PCR. J. Clin. Microbiol. 39: 8–13.
2. Levesque C., L. Piche, C. Larose, and P.H. Roy. 1995. PCR mapping of integrons reveals several novel combinations of resistance genes. Antimicrob. Agents Chemother. 39:185–191.
3. Poirel L., G.F. Weldhagen, T. Naas, C. De Champs, M.G. Dove, and P. Nordmann. 2001. GES-2, a class A  $\beta$ -lactamase from *Pseudomonas aeruginosa* with increased hydrolysis of imipenem. Antimicrob. Agents Chemother. 45:2598–2603.
4. Ploy M.C., F. Denis, P. Courvalin and T. Lambert. 2000. Molecular characterization of integrons in *Acinetobacter baumannii*: description of a hybrid class 2 integron. Antimicrob. Agents Chemother. 44: 2684–2688.
5. Kim J-Y., Y-J. Park, H.J. Kwon, K. Han, M.W. Kang, and G-J. Woo. 2008. Occurrence and mechanisms of amikacin resistance and its association with  $\beta$ -lactamases in *Pseudomonas aeruginosa*: a Korean nationwide study. J. Antimicrob. Chemother. 62(3): 479-483.
6. Szczepanowski R., B. Linke, I. Krahn, K-H. Gartemann, T. Gützkow, W. Eichler, A. Pühler, and A. Schlüter. 2009. Detection of 140 clinically relevant antibiotic-resistance genes in the plasmid metagenome of wastewater treatment plant bacteria showing reduced susceptibility to selected antibiotics. Microbiology. 155:2306-2319.
7. Thapa B., C. Tribuddharat, S. Srifuengfung, and C. Dhiraputra. Class 1 integron element in Thai *Acinetobacter baumannii* reveals a linkage to the European clone I. Int. J. Infect. Microbiol. <http://nepjol.info/index.php/IJIM/article/view/6715>.
8. Yamane K., J. Wachino, Y. Doi, H. Kurokawa, and Y. Arakawa. Global spread of multiple aminoglycoside resistance genes. Emerg. Infect. Dis. 11:951-953.
9. Wareham D.W., I. Umoren, P. Khanna, and N.C. Gordon. 2010. Allele-specific polymerase chain reaction (PCR) for rapid detection of the *aac(6')-Ib-cr* quinolone resistance gene. Int. J. Antimicrob. Agents. 36:476-477.
10. Aminov, R. I., J.C. Chee-Sanford, N. Garrigues, B. Teferedegne, I.J. Krapac, B.A. White, and R.I. Mackie. 2002. Development, validation, and application of PCR primers for detection of tetracycline efflux genes of gram-negative bacteria. Appl. Environ. Microbiol. 68:1786-1793.
11. Stine, O.C., J.A. Johnson, A. Keefer-Norris, K.L. Perry, J. Tigno, S. Qaiyumi, M.S. Stine, and J.G. Morris, Jr. 2007. Widespread distribution of tetracycline resistance genes in a confined animal feeding facility. Int. J. Antimicrob. Agents. 29:348-352.
12. Agersø, Y., and L. Guardabassi. 2005. Identification of Tet39, a novel class of tetracycline resistance determinant in *Acinetobacter* spp. of environmental and clinical origin. J. Antimicrob. Chemother. 55:566-569.
13. Woodford N., M.J. Ellington, J.M. Coelho, J.F. Turton, M.E. Ward, S. Brown, S.G. Amyes, and D.M. Livermore. 2006. Multiplex PCR for genes encoding prevalent OXA carbapenemases in *Acinetobacter* spp. Int. J. Antimicrob. Agents. 27:351–353.
14. Turton J.F., M.E. Ward, N. Woodford, M.E. Kaufmann, R. Pike, D.M. Livermore, and T.L. Pitt. 2006. The role of IS*Aba* 1 in expression of OXA carbapenemase genes in *Acinetobacter baumannii*. FEMS Microbiol. Lett. 258:72–77.
15. Segal H., S. Garry, and B.G. Elisha. 2005. Is IS*Aba*-1 customized for *Acinetobacter*? FEMS Microbiol. Lett. 243:425–429.









|                    |   |   |   |   |   |   |   |   |   |
|--------------------|---|---|---|---|---|---|---|---|---|
| tet(Y)             | n | n | n | n | n | n | n | n | n |
| tet(Z)             | n | n | n | n | n | n | n | n | n |
| tetA(P)            | n | n | n | n | n | n | n | n | n |
| tetB(P)            | n | n | n | n | n | n | n | n | n |
| tetO/tet32 family  | n | n | n | n | n | n | n | n | n |
| uppP               | Y | Y | Y | Y | Y | Y | Y | Y | Y |
| van(A)             | n | n | n | n | n | n | n | n | n |
| van(B)/(B2) family | n | n | n | n | n | n | n | n | n |
| van(C1)            | n | n | n | n | n | n | n | n | n |
| van(C3)            | n | n | n | n | n | n | n | n | n |
| van(E)             | n | n | n | n | n | n | n | n | n |
| van(F)             | n | n | n | n | n | n | n | n | n |
| van(G)             | n | n | n | n | n | n | n | n | n |
| van(H)             | n | n | n | n | n | n | n | n | n |
| van(S)             | n | n | n | n | n | n | n | n | n |
| van(X)             | n | n | n | n | n | n | n | n | n |
| van(Y)             | n | n | n | n | n | n | n | n | n |
| vanD4/D5 family    | n | n | n | n | n | n | n | n | n |
| vat(A)             | n | n | n | n | n | n | n | n | n |
| vat(B)             | n | n | n | n | n | n | n | n | n |
| vat(C)             | n | n | n | n | n | n | n | n | n |
| vat(D)/sat(A)      | n | n | n | n | n | n | n | n | n |
| vat(E6)            | n | n | n | n | n | n | n | n | n |
| vat(F)/sat         | n | n | n | n | n | n | n | n | n |
| vcaM               | n | n | n | n | n | n | n | n | n |
| vceA               | n | n | n | n | n | n | n | n | n |
| vceB               | n | n | n | n | n | n | n | n | n |
| vcmA               | n | n | n | n | n | n | n | n | n |
| vcrM               | n | n | n | n | n | n | n | n | n |
| vga(A)lc           | n | n | n | n | n | n | n | n | n |
| vga(B)             | n | n | n | n | n | n | n | n | n |
| vgb(A)/vgh         | n | n | n | n | n | n | n | n | n |
| vgb(B)             | n | n | n | n | n | n | n | n | n |

|                |     |     |     |     |            |
|----------------|-----|-----|-----|-----|------------|
| true positive  | 11  | 17  | 8   | 11  | <b>47</b>  |
| true negative  | 227 | 218 | 228 | 227 | <b>900</b> |
| false positive | 0   | 0   | 0   | 0   | <b>0</b>   |
| false negative | 0   | 3   | 2   | 0   | <b>5</b>   |

|      |     | PCR |     |
|------|-----|-----|-----|
|      |     | Pos | Neg |
| ARDM | pos | 47  | 0   |
|      | neg | 5   | 900 |

|             |             |                   |                      |
|-------------|-------------|-------------------|----------------------|
| Sensitivity | Specificity | Pos predict value | Neg predictive value |
| 90%         | 100%        | 100%              | 99%                  |
